# Supplementary material
Source: publisher site journal article supplement (https://static.cambridge.org/content/id/urn:cambridge.org:id:article:S000711452000063X/resource/name/S000711452000063Xsupp001.docx)
Supplement: Supplementary file 1 [file S000711452000063Xsupp001.docx]

Table S2 Ingredients and nutrient composition of the experimental diets for pregnant ewes.

| Items | Diets |
| --- | --- |
| Ingredient composition (% DM) |  |
| Corn silage | 39.30 |
| Oat hay | 36.20 |
| Maize | 13.50 |
| Soybean | 4.40 |
| wheat bran | 4.90 |
| NaCl | 0.70 |
| Premix1 | 1.00 |
| Nutrient composition |  |
| Net energy (MJ/kg DM) | 5.18 |
| CP (% DM) | 12.95 |
| Crude fat (% DM) | 2.90 |
| NDF (% DM) | 33.55 |
| ADF (% DM) | 53.20 |
| Crude ash (% DM) | 8.30 |
| Calcium (% DM) | 0.35 |
| Phosphorus (% DM) | 0.31 |

DM = dry matter basis.

1The premix (per kg) contained: vitamin A 64.8 mg, vitamin D2 1.35 mg, vitamin E 1080 mg, nicotinic acid 353 mg, Mn 537 mg, Cu 540 mg, Zn 2422 mg, Co 7.2 mg, I 32 mg, Se 18 mg, P 66 g, Ca 130 g, NaHCO3 89 g.
